# Supplementary material for: Synthesis and properties of stimuli-sensitive heterografted toothbrush-like terpolymers with a linear handle and two types of V-shaped grafts
Source: Royal Society of Chemistry journal article supplement (doi:10.1039/c6py00182c), 2016-01-01
Supplement: c6py00182c1.pdf [file c6py00182c1.pdf]

## Supporting Information

# Synthesis and properties of stimuli-sensitive heterografted toothbrushlike terpolymers with linear handle and two types of V-shaped grafts

Min Tong, Xiaonan An, Weidong Pan, Huanhuan Liu and Youliang Zhao\*

Suzhou Key Laboratory of Macromolecular Design and Precision Synthesis, Jiangsu Key Laboratory of Advanced Functional Polymer Design and Application, State and Local Joint Engineering Laboratory for Novel Functional Polymeric Materials, College of Chemistry, Chemical Engineering and Materials Science, Soochow University, Suzhou 215123, China

**Table S1.** Results for synthesis of PNIPAM-OH (run 1), PNIPAM-*b*-PCL (run 2) and PNIPAM-*b*-PCL-*b*-PtBA (run 3)<sup>a</sup>

| run | I <sup>b</sup>           | M           | T (°C) | t (h) | C% <sup>c</sup> | M <sub>n,th</sub> <sup>d</sup> | M <sub>n,GPC</sub> <sup>e</sup> | PDI <sup>e</sup> | M <sub>n,NMR</sub> <sup>f</sup> | DP <sub>PM</sub> <sup>f</sup> |
|-----|--------------------------|-------------|--------|-------|-----------------|--------------------------------|---------------------------------|------------------|---------------------------------|-------------------------------|
| 1   | CHDB                     | NIPAM       | 70     | 18    | 50.5            | 4830                           | 4950                            | 1.09             | 4810                            | 40.2                          |
| 2   | PNIPAM-OH                | CL          | 110    | 20    | 97.2            | 10400                          | 13200                           | 1.08             | 10300                           | 48.3                          |
| 3   | PNIPAM- <i>b</i> -PCL-Br | <i>t</i> BA | 80     | 12    | 49.0            | 18000                          | 19600                           | 1.11             | 17800                           | 56.9                          |

<sup>a</sup> Reaction conditions: [NIPAM]<sub>0</sub>: [CHDB]<sub>0</sub>: [AIBN]<sub>0</sub> = 80:1:0.1, [M]<sub>0</sub> = 3.0 mol L<sup>-1</sup>, in dioxane (run 1); [CL]<sub>0</sub>: [PNIPAM]<sub>0</sub>: [Sn(Oct)<sub>2</sub>]<sub>0</sub> = 50:1:0.2, [M]<sub>0</sub> = 1.9 mol L<sup>-1</sup>, in toluene, and then the isolated PNIPAM-*b*-PCL copolymer was further reacted with 2-bromoisobutyryl bromide to generate PNIPAM-*b*-PCL-Br (run 2); [*t*BA]<sub>0</sub>: [AB-Br]<sub>0</sub>: [CuBr]<sub>0</sub>: [PMDETA]<sub>0</sub> = 120:1:1:1, [M]<sub>0</sub> = 1.5 mol L<sup>-1</sup>, in acetone (run 3). <sup>b</sup> Functional RAFT agent (run 1) and macroinitiator (runs 2 and 3). <sup>c</sup> Monomer conversion determined by gravimetry. <sup>d</sup> Theoretical molecular weight. <sup>e</sup> Number-average molecular weight and polydispersity estimated by GPC. <sup>f</sup> Number-average molecular weight (M<sub>n,NMR</sub>) and polymerization degree of PM segment (DP<sub>PM</sub>) determined by <sup>1</sup>H NMR analysis.

**Table S2.** Glass transition temperature ( $T_g$ ), melting peak ( $T_m$ ) and degree of crystallinity ( $X_c$ ) of various samples

| sample | $T_g$ (°C)         | $T_m$ (°C) | $X_c$ (%) | $f_{w,PCL}$ |
|--------|--------------------|------------|-----------|-------------|
| PNIPAM | 135.9              | —          | —         | —           |
| PNSM   | 121.2              | —          | —         | —           |
| T1     | 49.5, 113.9        | —          | —         | —           |
| T2     | -44.5, 117.1       | 49.7       | 13.3      | 0.203       |
| T3     | -45.2, 115.0       | 49.6       | 32.3      | 0.306       |
| T4     | -50.5, 106.4       | 50.4       | 44.8      | 0.478       |
| T5     | -58.7, 85.3, 112.7 | 48.0, 56.4 | 24.4      | 0.252       |
| T6     | -59.6, 85.1, 110.4 | 45.5, 54.4 | 37.6      | 0.368       |
| T7     | -61.0, 88.6, 112.4 | 49.8       | 52.6      | 0.550       |

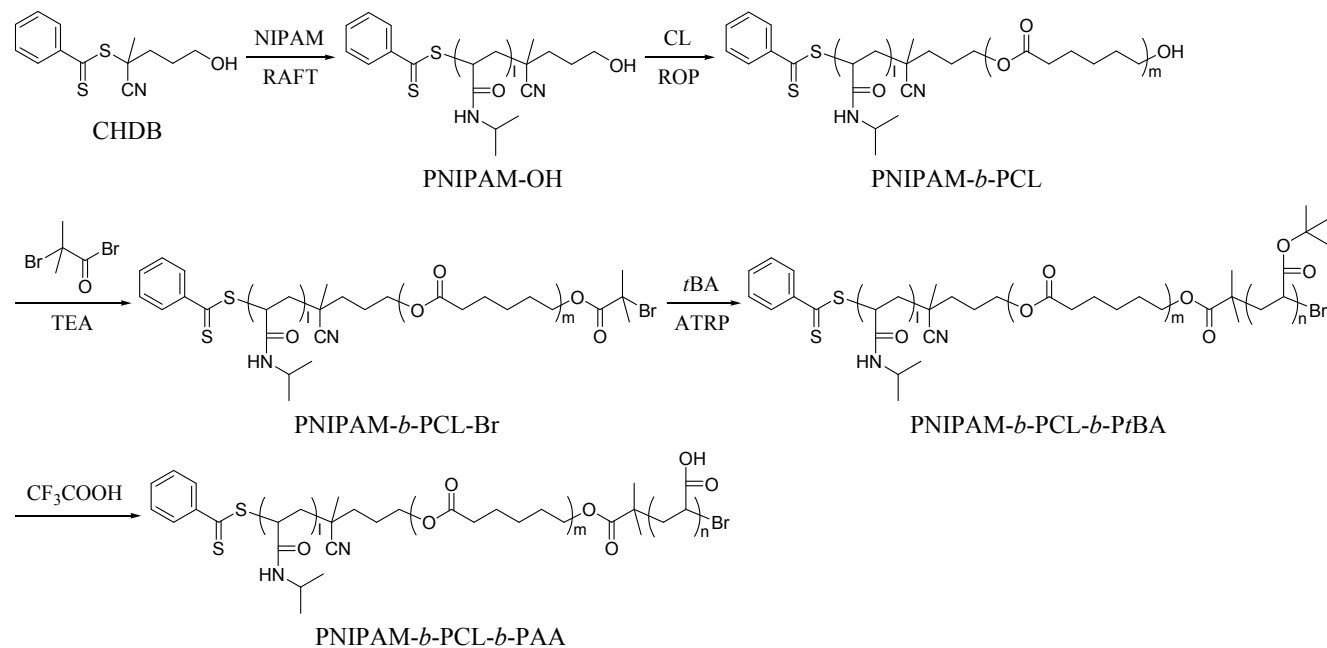

**Scheme S1** Synthetic routes to PNIPAM-*b*-PCL-*b*-PAA triblock copolymer.

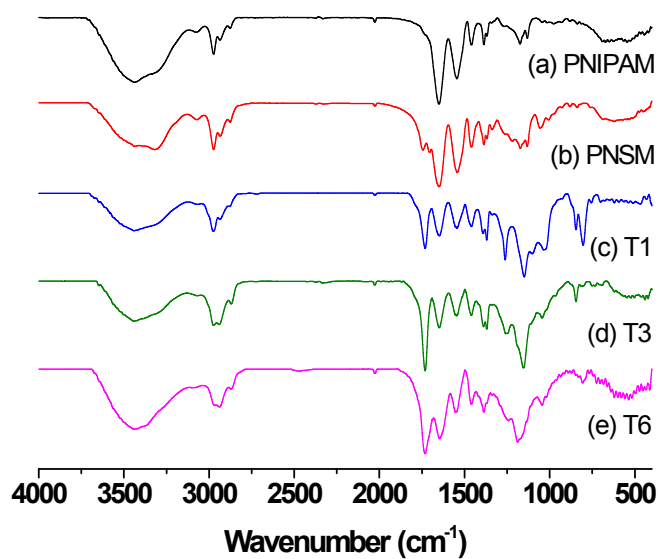

**Fig. S1** IR spectra of typical toothbrushlike terpolymers and their precursors.

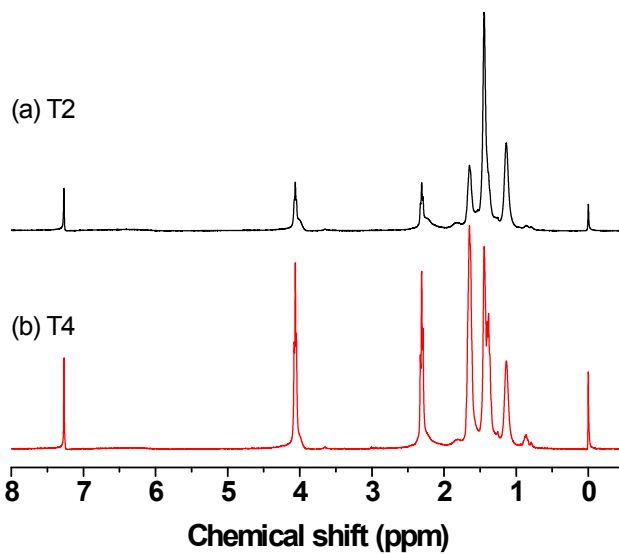

**Fig. S2** <sup>1</sup>H NMR spectra of PNIPAM(*Pt*BA)<sub>2m</sub>(PCL)<sub>2m</sub> copolymers.

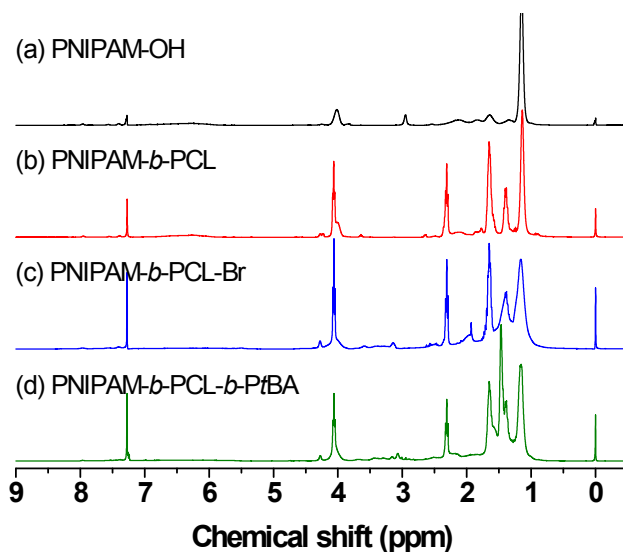

**Fig. S3**  $^1\text{H}$  NMR spectra of PNIPAM-*b*-PCL-*b*-PtBA triblock copolymer and its precursors.

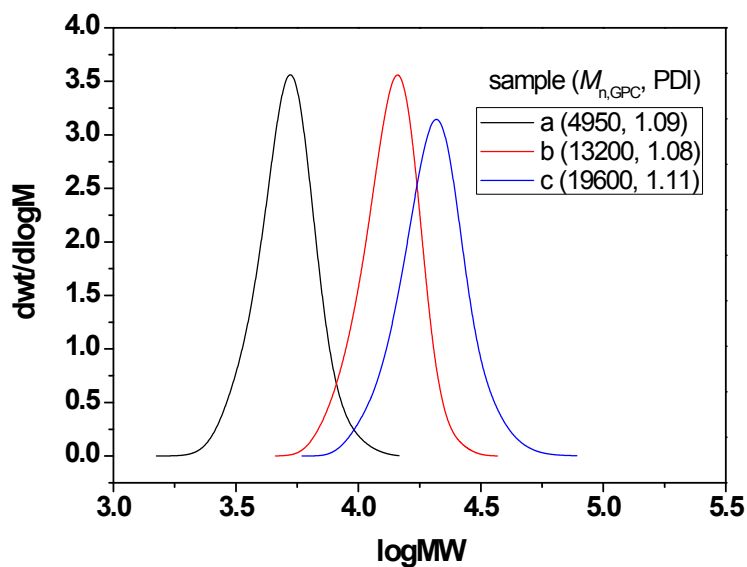

**Fig. S4** GPC traces of PNIPAM-OH (a), PNIPAM-*b*-PCL (b) and PNIPAM-*b*-PCL-*b*-PtBA (c).

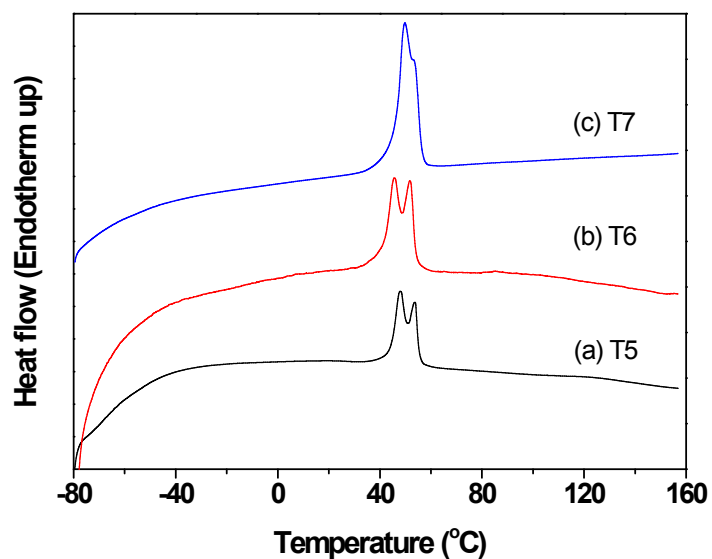

Fig. S5 DSC curves of PNIPAM(PAA)<sub>2m</sub>(PCL)<sub>2m</sub> copolymers.

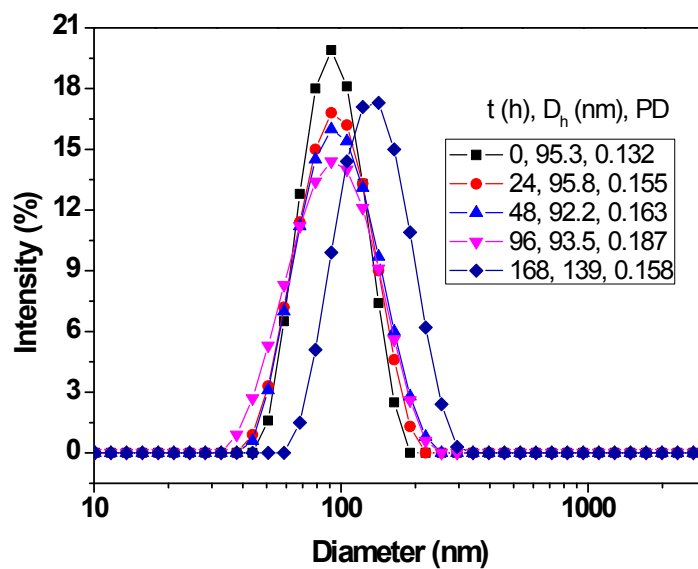

Fig. S6 Influence of storage time on DLS plots of T6 aggregates ( $c = 0.50 \text{ mg mL}^{-1}$ ) formed in PBS solution (50 mM) at 37 °C.
